# Supplementary material
Source: publisher site journal article supplement (https://www.dovepress.com/article/614007)
Supplement: Supplementary file 1 [file 614007%20Revised%20%2509Supplementary%20material.docx]

**Appendix S1. Perioperative management of special events**

Intraoperative adverse hemodynamic events and inadequate anesthesia depth were managed promptly using the following strategies:

1.Bradycardia: Severe bradycardia, defined as a HR below 45 beats per minute, was treated with atropine at a dose of 0.01 mg/kg to quickly restore normal HR.

2.Hypotension: Hypotension, defined as a ≥20% decrease in blood pressure or a mean arterial pressure (MAP) < 50 mmHg, was assessed alongside BIS values. If the BIS was <40, which indicating deep anesthesia, the sevoflurane concentration was reduced immediately to reduce the depth of sedation. After this adjustment, vasoactive drugs could be administered to stabilize blood pressure, if necessary, based on the patient's hemodynamic response. If BIS values were within the target range (40-60), hypotension was treated with fluid resuscitation, 6 mg ephedrine or 4 µg norepinephrine to restore stability.

3.Hypertension and/or tachycardia: Intraoperative hypertension, defined as an increase of ≥20% from baseline or a MAP ≥100 mmHg, and tachycardia, defined as an increase of ≥20% from baseline or a heart rate (HR) >100 beats per minute, were treated according to the accompanying clinical context. If hypertension and/or tachycardia were associated with a high BIS (>60), the concentration of sevoflurane was gradually increased to reduce the BIS to ≤55, indicating improved depth of anesthesia. Following this adjustment, the patient's physiological status and depth of anesthesia were reassessed to ensure safe and effective management. For isolated hypertension or tachycardia unrelated to inadequate depth of anesthesia, pain management was the first approach. If analgesia was adequate but hypertension or tachycardia persisted, factors such as patient posture or pneumoperitoneum were evaluated. Targeted treatment with vasoactive drugs such as nicardipine for hypertension or esmolol for tachycardia was then considered. The decision to administer these drugs was based on a comprehensive assessment of the patient's condition.

**Table S1**. Exploratory subgroup analysis of gender baseline and primary outcomes

|  | Females (n=24) | | *p*-value | Males (n=21) | | *p*-value |
| --- | --- | --- | --- | --- | --- | --- |
| Morning group  (n=13) | Afternoon group  (n=11) | Morning group  (n=11) | Afternoon group  (n=10) |
| Age (years) | 47.92±13.30 | 47.82±14.27 | 0.985 | 45.18±11.85 | 45.10±10.89 | 0.856 |
| Weight (kg) | 64.46±6.59 | 62.64±6.82 | 0.513 | 74.18±10.03 | 75.00±11.40 | 0.863 |
| BMI (kg/m2) | 24.79±2.40 | 23.75±2.35 | 0.298 | 24.35±2.89 | 24.63±2.93 | 0.830 |
| Operation duration (min) | 58.00  (42.00-82.50) | 60.00  (45.00-75.00) | 0.931 | 53.27±14.80 | 60.60±12.82 | 0.242 |
| Anesthesia duration (min) | 84.00  (65.50-101.00) | 83.00  (66.00-96.00) | 0.931 | 75.27±16.34 | 85.60±14.00 | 0.286 |
| Sufentanil consumption (ug) | 45.81±12.00 | 33.00±5.72 | 0.003 | 49.50±12.95 | 39.55±12.65 | 0.091 |
| Unit sufentanil consumption (μg/kg/h) | 0.51±0.12 | 0.39±0.07 | 0.010 | 0.55±0.13 | 0.39±0.12 | 0.012 |

Data are presented as mean ± standard deviation (SD) or medians (25th-75th percentile). BMI, Body Mass Index

**Table S2**. Multivariable analysis of primary outcomes

|  | Variables | β | 95% CI | *p*-value |
| --- | --- | --- | --- | --- |
| Model for sufentanil consumption | Gender | 4.658 | -2.952-12.269 | 0.224 |
| Age | -0.074 | -0.385-0.238 | 0.636 |
| Model for unit sufentanil consumption | Gender | 0.015 | -0.065-0.095 | 0.702 |
| Age | -0.001 | -0.005-0.002 | 0.422 |
